# Supplementary material
Source: Springer Nature journal article supplement (https://www.springermedizin.de/resource/supplementary/12943_2012_1116_MOESM6_ESM.pdf/9552528)

A

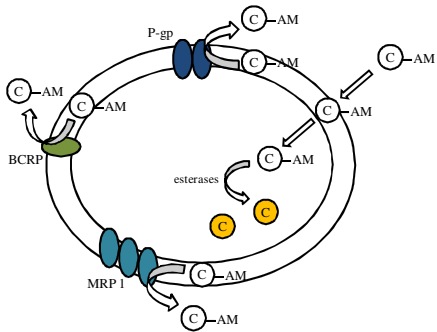

 Celecoxib

 Calcein

 Calcein-AM

B

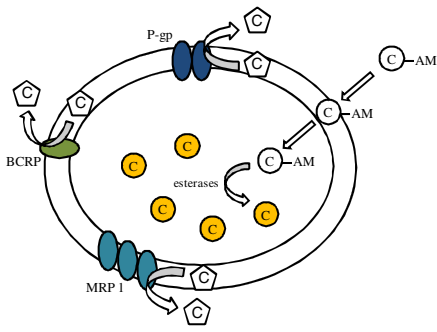

Supplement: MOESM6 [file 9552528]
